# Supplementary material for: Methanolic Extracts of Chiococca alba in Aedes aegypti Biorational Management: Larvicidal and Repellent Potential, and Selectivity against Non-Target Organisms
Source: MDPI journal article supplement (doi:10.3390/plants11233298), 2022-11-29
Supplement: s1 [file s1]

**Supplementary Table S1** - Summary of nonlinear regression analyses of the curves shown in **Figure 2**.

|                                  |            |              |                |
|----------------------------------|------------|--------------|----------------|
| Model ( <b>Figure 2A</b> )       | Polynomial |              |                |
| Adj. R-Square                    | --         | 0,96301      | -0,135         |
|                                  |            | Value        | Standard Error |
| DEET (Control)                   | Intercept  | 100          | 1,42431E-14    |
| DEET (Control)                   | B1         | -7,71546E-16 | 4,31764E-16    |
| DEET (Control)                   | B2         | 3,76904E-18  | 2,58808E-18    |
| Alcohol 70%                      | Intercept  | 100,75997    | 0,72075        |
| Alcohol 70%                      | B1         | -0,0286      | 0,02185        |
| Alcohol 70%                      | B2         | -1,70154E-4  | 1,30965E-4     |
| Propylene glycol and alcohol 70% | Intercept  | 100,39811    | 0,54404        |
| Propylene glycol and alcohol 70% | B1         | -0,01955     | 0,01649        |
| Propylene glycol and alcohol 70% | B2         | 1,14646E-4   | 9,88564E-5     |
| Gel                              | Intercept  | 99,89907     | 1,15496        |
| Gel                              | B1         | 0,00218      | 0,03501        |
| Gel                              | B2         | -2,73686E-4  | 2,09865E-4     |
| Cream                            | Intercept  | 102,04376    | 3,16329        |
| Cream                            | B1         | -0,20373     | 0,09589        |
| Cream                            | B2         | -1,0315E-4   | 5,74793E-4     |
|                                  |            |              |                |
| Model ( <b>Figure 2B</b> )       | Polynomial |              |                |
| Adj. R-Square                    | --         | 0,91289      | 0,94179        |
|                                  |            | Value        | Standard Error |
| DEET                             | Intercept  | 100          | 1,42431E-14    |
| DEET                             | B1         | -7,71546E-16 | 4,31764E-16    |
| DEET                             | B2         | 3,76904E-18  | 2,58808E-18    |
| Propyleneglycol and Alcohol 70%  | Intercept  | 101,36842    | 2,45177        |
| Propyleneglycol and Alcohol 70%  | B1         | -0,0329      | 0,07432        |
| Propyleneglycol and Alcohol 70%  | B2         | -5,47212E-4  | 4,45506E-4     |
| Gel                              | Intercept  | 100,22064    | 1,30296        |
| Gel                              | B1         | 0,00991      | 0,0395         |
| Gel                              | B2         | -5,43613E-4  | 2,36759E-4     |
| Cream                            | Intercept  | 100,79593    | 1,75284        |
| Cream                            | B1         | -0,00747     | 0,05314        |
| Cream                            | B2         | -6,05363E-4  | 3,18504E-4     |
| Gel *                            | Intercept  | 97,66122     | 4,16982        |
| Gel *                            | B1         | 0,01373      | 0,1264         |
| Gel *                            | B2         | -0,00113     | 7,57688E-4     |
|                                  |            |              |                |
| Model ( <b>figure 2C</b> )       | Polynomial |              |                |
| Adj. R-Square                    | --         | 0,91936      | -0,135         |
|                                  |            | Value        | Standard Error |

|                                  |            |             |                |
|----------------------------------|------------|-------------|----------------|
| DEET (Control)                   | Intercept  | 0           | 0              |
| DEET (Control)                   | B1         | 0           | 0              |
| DEET (Control)                   | B2         | 0           | 0              |
| Alcohol 70%                      | Intercept  | -0,24169    | 0,19281        |
| Alcohol 70%                      | B1         | 0,01103     | 0,00584        |
| Alcohol 70%                      | B2         | -5,60492E-6 | 3,50359E-5     |
| Propylene glycol and alcohol 70% | Intercept  | -0,07962    | 0,10881        |
| Propylene glycol and alcohol 70% | B1         | 0,00391     | 0,0033         |
| Propylene glycol and alcohol 70% | B2         | -2,29292E-5 | 1,97713E-5     |
| Gel                              | Intercept  | -0,1        | 0,22838        |
| Gel                              | B1         | 0,00667     | 0,00692        |
| Gel                              | B2         | 1,26172E-20 | 4,14976E-5     |
| Cream                            | Intercept  | -0,86071    | 0,57887        |
| Cream                            | B1         | 0,07938     | 0,01755        |
| Cream                            | B2         | -2,80501E-4 | 1,05184E-4     |
|                                  |            |             |                |
| Model ( <b>Figure 2D</b> )       | Polynomial |             |                |
| Adj. R-Square                    | --         | 0,9074      | 0,89754        |
|                                  |            | Value       | Standard Error |
| DEET (Control)                   | Intercept  | 0           | 0              |
| DEET (Control)                   | B1         | 0           | 0              |
| DEET (Control)                   | B2         | 0           | 0              |
| Propyleneglycol and Alcohol 70%  | Intercept  | -1,1513     | 1,86546        |
| Propyleneglycol and Alcohol 70%  | B1         | 0,03125     | 0,05655        |
| Propyleneglycol and Alcohol 70%  | B2         | 3,61517E-4  | 3,38968E-4     |
| Gel                              | Intercept  | 1,60475     | 2,78932        |
| Gel                              | B1         | 1,34422E-4  | 0,08456        |
| Gel                              | B2         | 7,72428E-4  | 5,06841E-4     |
| Cream                            | Intercept  | -0,71947    | 1,39449        |
| Cream                            | B1         | 0,01195     | 0,04227        |
| Cream                            | B2         | 4,05401E-4  | 2,53389E-4     |
| Gel*                             | Intercept  | 1,60475     | 2,78932        |
| Gel*                             | B1         | 1,34422E-4  | 0,08456        |
| Gel*                             | B2         | 7,72428E-4  | 5,06841E-4     |

**Supplementary Table S2.** Analysis of variance with repeated measures over time for total number of *A. aegypti* larvae preyed (with and without recovery) by *B. anurum* after exposure to extract of *C. alba*.

| Sources of variation | <i>df</i>               | <i>F</i>                | <i>P</i>      |          |          |
|----------------------|-------------------------|-------------------------|---------------|----------|----------|
| Between factors      |                         |                         |               |          |          |
| Extract (Ex)         | 1                       | 3.43                    | 0.07          |          |          |
| Error                | 28                      | -                       | -             |          |          |
|                      | <i>df<sub>num</sub></i> | <i>df<sub>den</sub></i> | Wilks' lambda | <i>F</i> | <i>P</i> |
| Within each factor   |                         |                         |               |          |          |
| Recovery time (RT)   | 1                       | 28                      | 0.247         | 85.57    | <0.0001* |
| RT × Ex              | 1                       | 28                      | 0.960         | 1.17     | 0.288    |

,

## 2D maps interactions with 3,5-dimethoxycinnamic acid

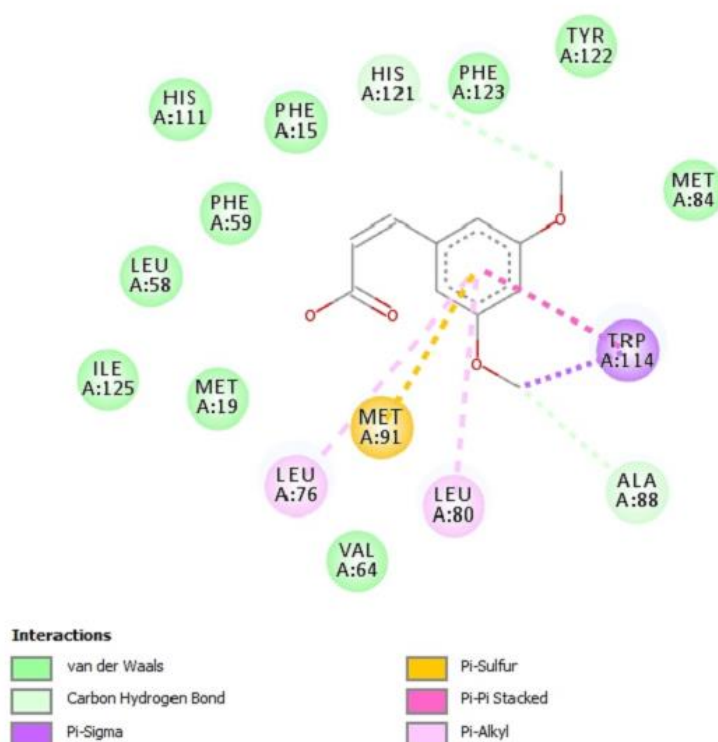

**Supplementary Figure S1.** 3,5-dimethoxycinnamic acid binds to *Aedes aegypti* odorant binding protein (AeagOBP1). The 2D maps demonstrating molecular interactions with amino acids from AeagOBP1 active site and 3,5-dimethoxycinnamic acid.

## 2D maps interactions with oleoyl alcohol trifluoroacetate

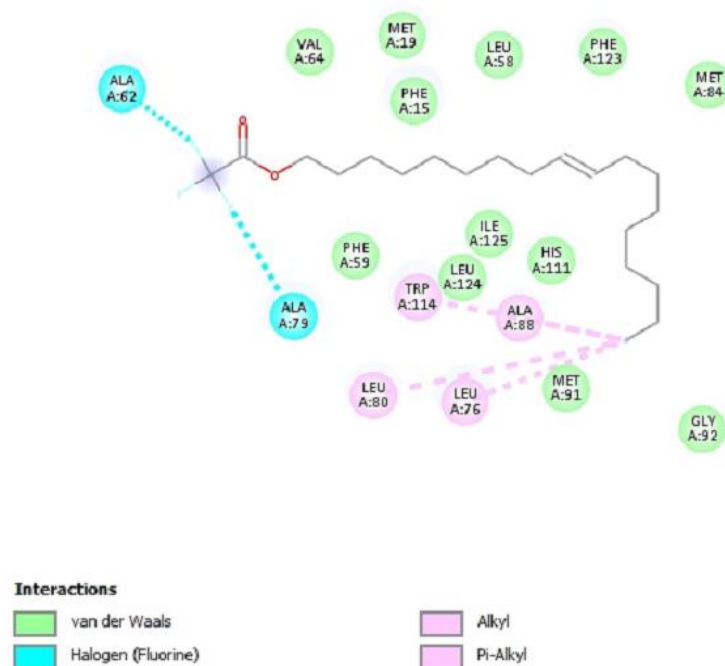

**Supplementary Figure S2.** Oleoyl alcohol trifluoroacetate binds to *Aedes aegypti* odorant binding protein (AeagOBP1). The 2D maps demonstrating molecular interactions with amino acids from AeagOBP1 active site and oleoyl alcohol trifluoroacetate.
